# Supplementary material for: Changes in inflammatory factors in the Brown Norway rat model of food allergy
Source: Springer Nature journal article supplement (doi:10.1186/s12865-021-00398-9), 2021-01-26
Supplement: MOESM1 [file 18801716]

Manuscript Title: Changes in inflammatory factors in the Brown Norway rat model of food allergy

Qingling Zhu, PhD<sup>a,b</sup>, Junli Wang, PhD<sup>a</sup>, Jingqiu Ma, PhD<sup>a</sup>, Xiaoyang Sheng, PhD<sup>a\*</sup>, Feng Li, PhD<sup>a\*</sup>

<sup>a</sup> Department of Child and Adolescent Healthcare, MOE-Shanghai Key Laboratory of Children's Environmental Health, Xinhua Hospital Affiliated to Shanghai Jiao Tong University School of Medicine, Shanghai, China 200092 ;

<sup>b</sup> Department of Children Healthcare, Quanzhou Women's and Children's Hospital, Quanzhou, Fujian, China 362000

**\*Corresponding author:**

1. Feng Li, Department of Child and Adolescent Healthcare, Xinhua Hospital Affiliated to Shanghai Jiao Tong University School of Medicine, No. 1665 Kongjiang Road, Yangpu Shanghai, China, 200092  
Tel: +86- 13512111965, E-mail: lifeng@xinhumed.com.cn

2. Xiaoyang Sheng, Department of Child and Adolescent Healthcare, Xinhua Hospital Affiliated to Shanghai Jiao Tong University School of Medicine, No. 1665 Kongjiang Road, Yangpu Shanghai, China, 200092

Tel: +86-13818072645, E-mail: shengxiaoyangcn@aliyun.com

**Supplementary Info File:**

Multiple exposures of Weston blot in Fig 3

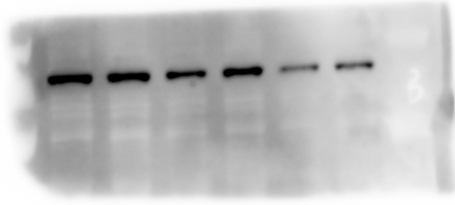

Sup 1 The levels of S100A8/A9 in the experimental group

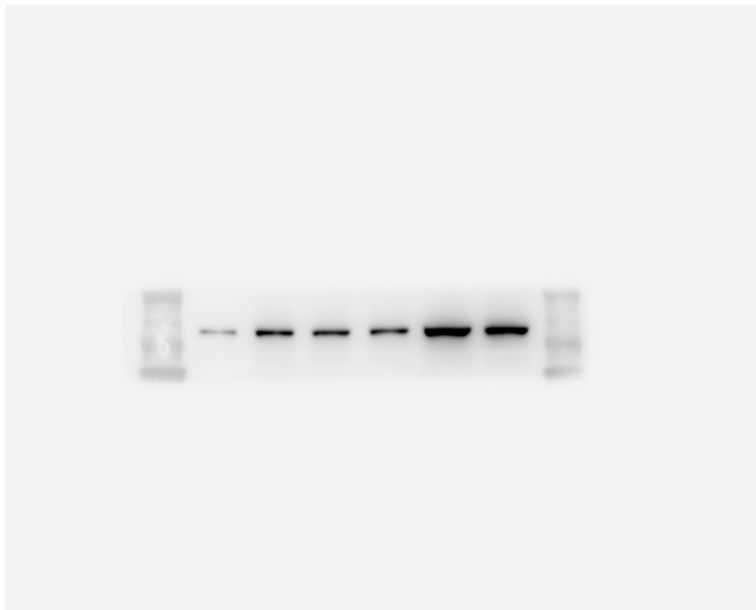

Sup 2 The levels of S100A8/A9 in the control group

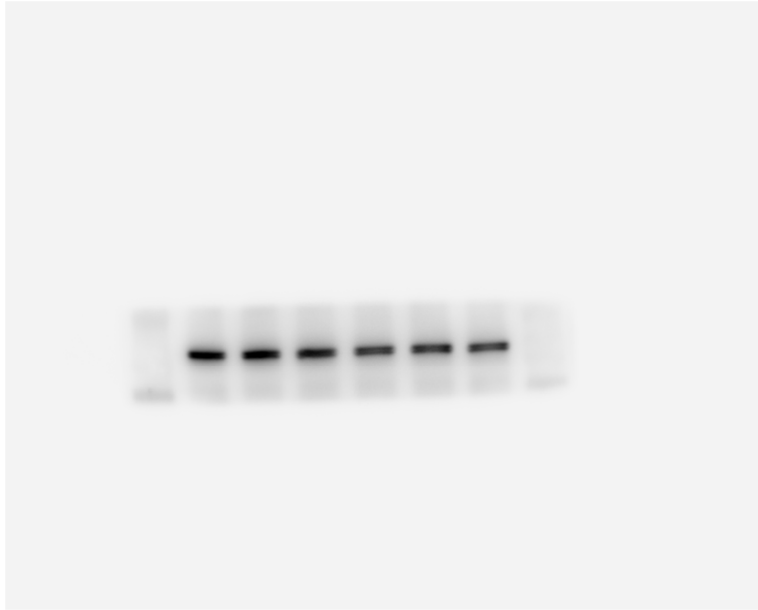

Sup 3 The levels of TLR4 in the experimental group

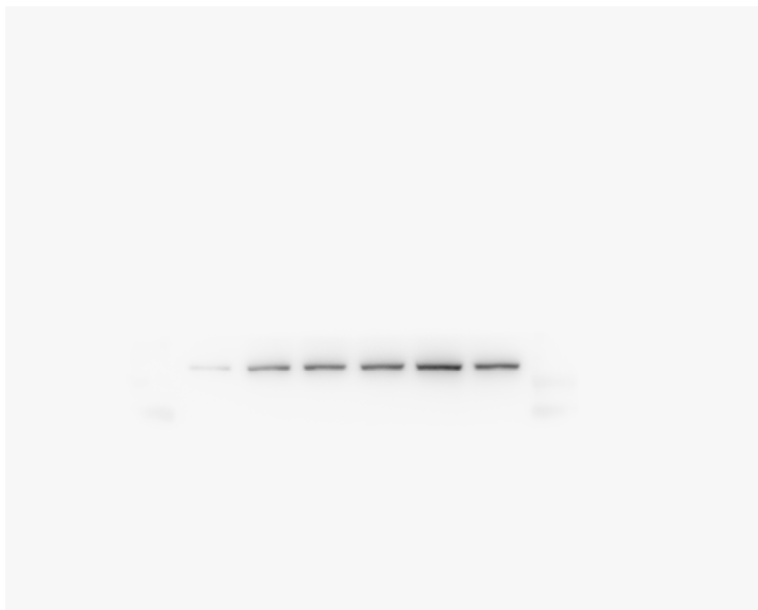

Sup 4 The levels of TLR4 in the control group

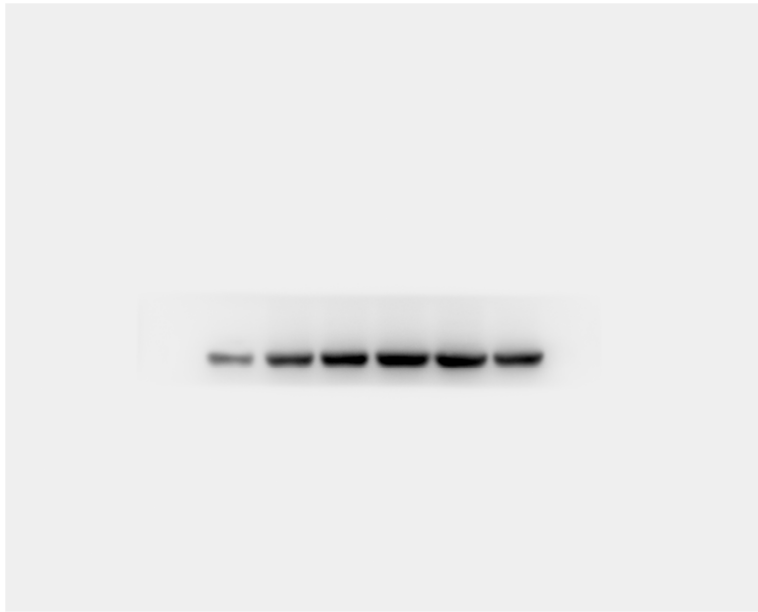

Sup 5 The levels of TNF- $\alpha$  in the experimental group

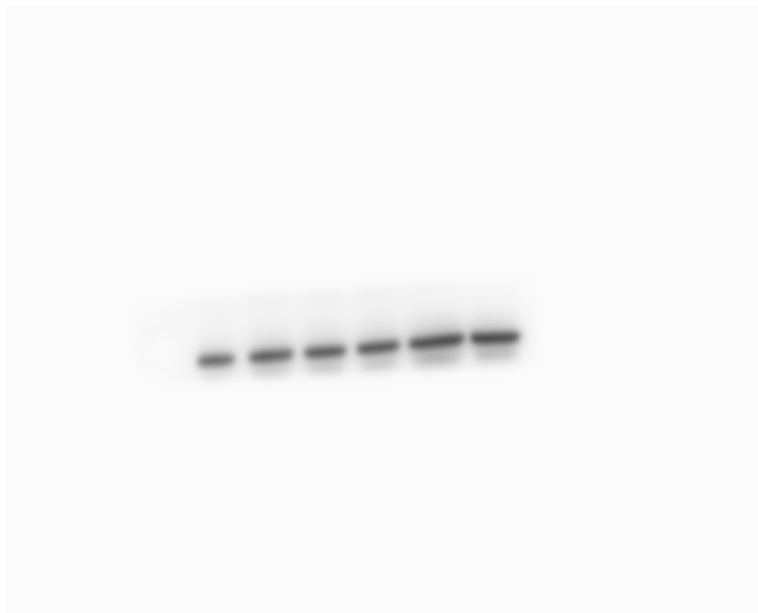

Sup 6 The levels of TNF- $\alpha$  in the control group

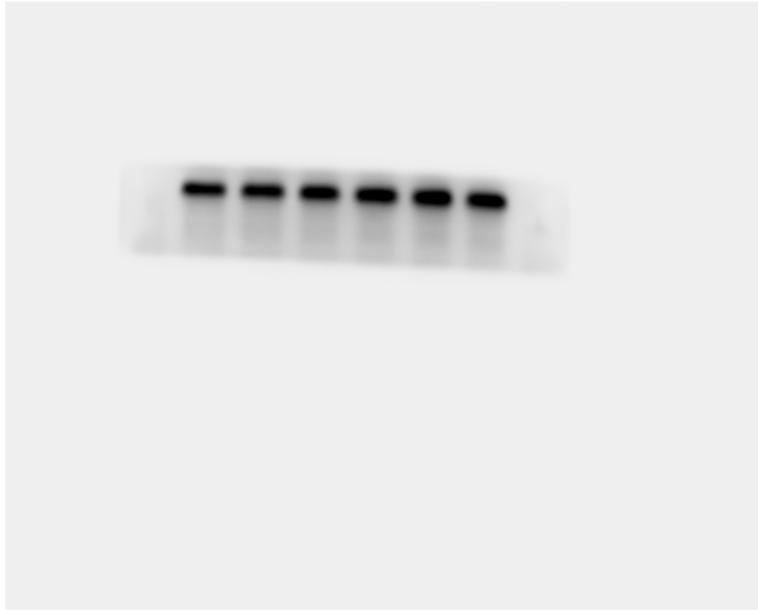

Sup 7 The levels of GAPDH in the experimental group

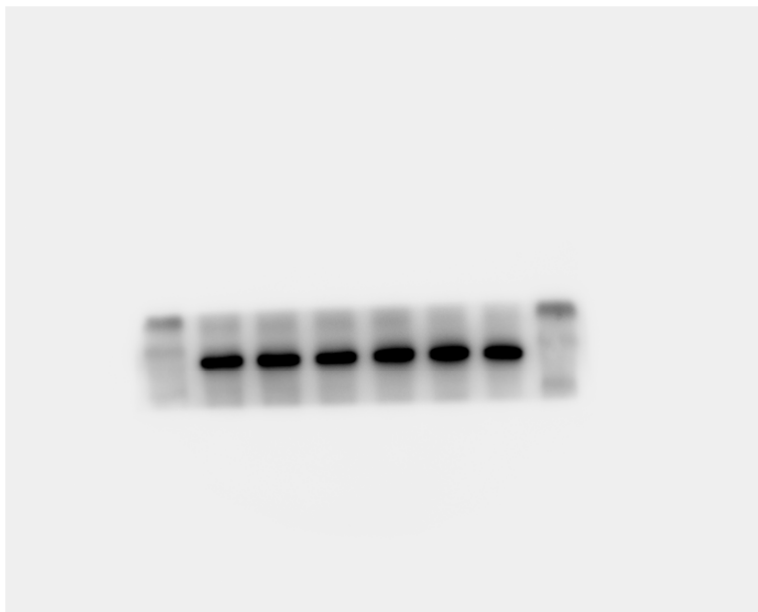

Sup 8 The levels of GAPDH in the control group
